# Supplementary material
Source: MDPI journal article supplement (https://www.mdpi.com/1999-4907/14/4/696)
Supplement: s1 [file s1]

**Table S1.** RT-qPCR, PagPIP2;10 CDS and selected primers used in this study.

| Gene name/ ID               | Forward primer           | Reverse primer         |
|-----------------------------|--------------------------|------------------------|
| <b>qRT-PCR</b>              |                          |                        |
| PagPIP2;10/Potri.012g085700 | CCACCGATCCTAAGCGGAAC     | ATGCCAGTTCCAGTGATGGG   |
| PagPIP2;10 /CDS             | ATGAGTAGTGAAGAGAGAAACAT  | AGTCTGCCCCACAACCGAGA   |
| <b>Selected preimer</b>     |                          |                        |
| 35S/NOS                     | GAAGTTCATTTTCATTTGGAGAGA | ATTGCCAAATGTTTGAACGATC |

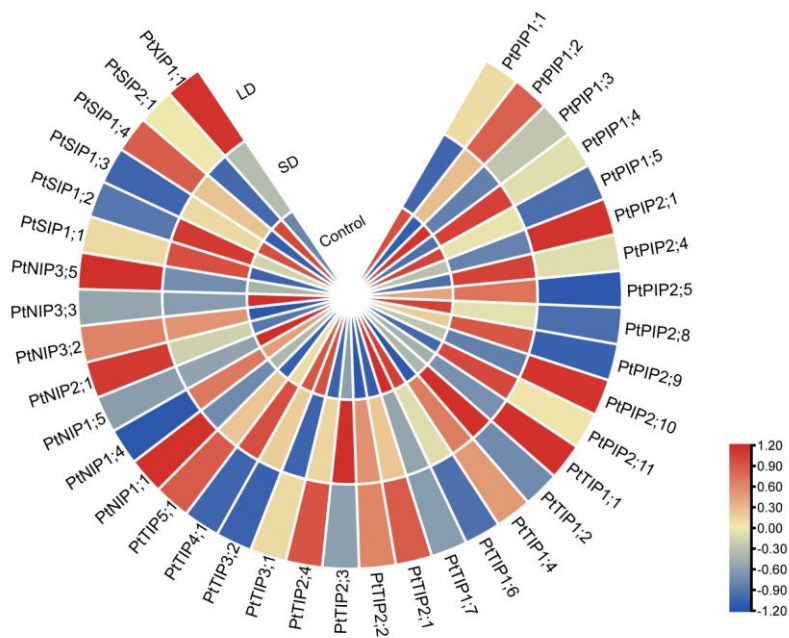

**Figure S1.** Expression analysis of *AQPs* family genes in poplar under drought stress.

LD, long drought; SD, short drought.

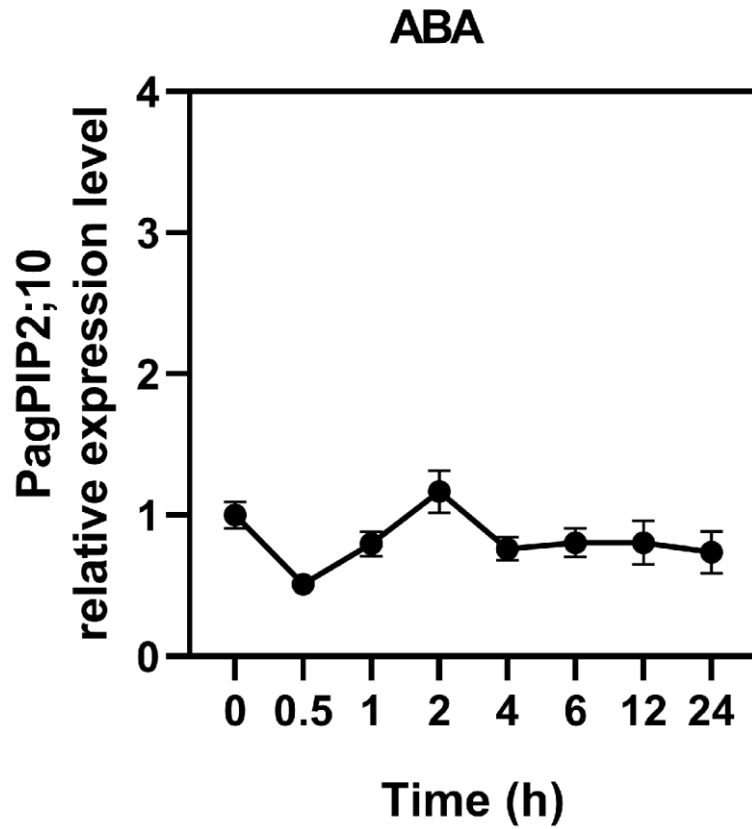

**Figure S2.** Expression level of *PagPIP2;10* after treatment of ABA.

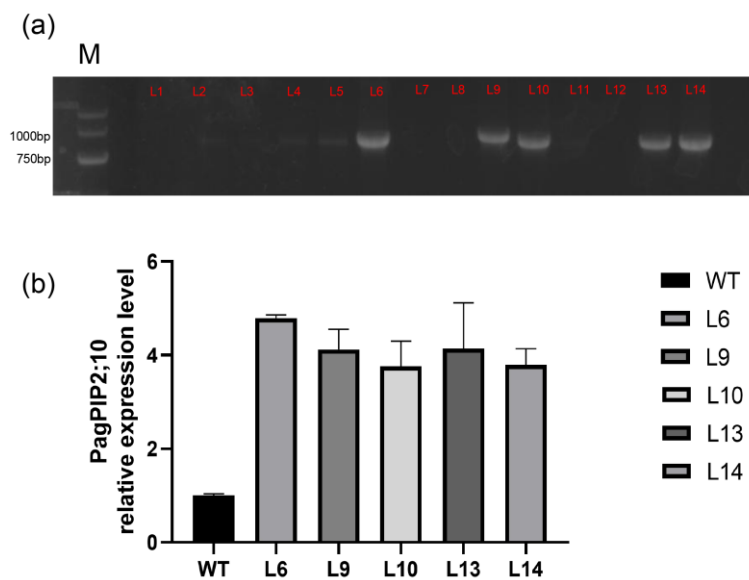

**Figure S3.** Selection of overexpression lines. (a) PCR analysis of plants; (b) Relative expression level of *PagPIP2;10* in selected lines by RT-qPCR.

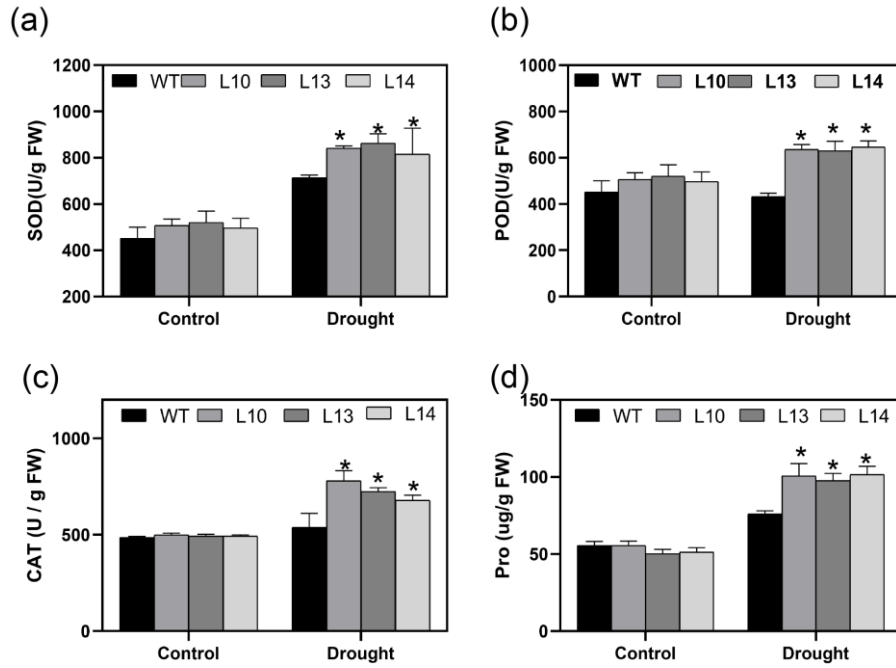

**Figure S4.** Activity of antioxidant enzymes in WT and overexpression lines after nine days of water deficit; (a) SOD activity; (b) POD activity; (c) CAT activity; (d) Proline content. Each treatment was performed with three biological replicates ( $n=3$ ) and values are means  $\pm$  SE. Data were analyzed through Student's t- test in the ANOVA program of SPSS (IBM SPSS17.0). \* indicates a significant difference compared with the control (\* $P < 0.05$ ).

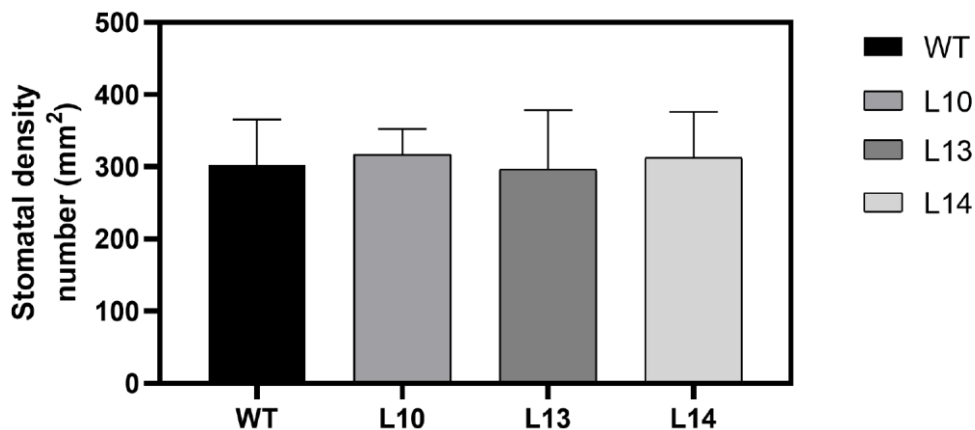

**Figure S5.** Stomatal density of WT and *PagPIP2;10ox* lines. Error bars are means  $\pm$  SE ( $n = 30$ ). Data were analyzed through the Student's t- test in the ANOVA program of SPSS (IBM SPSS17.0).
